# Supplementary material for: Low Cost MR Compatible Haptic Stimulation with Application to fMRI Neurofeedback
Source: MDPI journal article supplement (doi:10.3390/brainsci10110790), 2020-10-28
Supplement: s1 [file s1]

Figure S1

# Shopping List

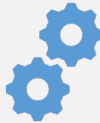

## Vibrating element

Any 3-5 volt DC vibrating motor - \$30  
(available from Amazon)

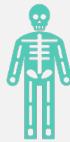

## Tube to get from the vibrating element to the subject

30' of 1" PVC tube - \$15  
Paracord – 100 ft - \$10  
Whatever will touch the subject, e.g., tennis ball, tape, and if you want it, pipe insulation - \$5  
(available from Hardware store, e.g. Lowe's)

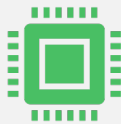

## Controller

Arduino Uno - \$25  
Controller - \$50  
Adafruitmotor Shield - \$20  
(available from Amazon)

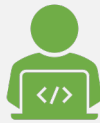

## Software

We have used Eprime and Matlab for this
