# Supplementary figures and images for: Low Cost MR Compatible Haptic Stimulation with Application to fMRI Neurofeedback
Source: MDPI journal article supplement (doi:10.3390/brainsci10110790), 2020-10-28

Figure S2

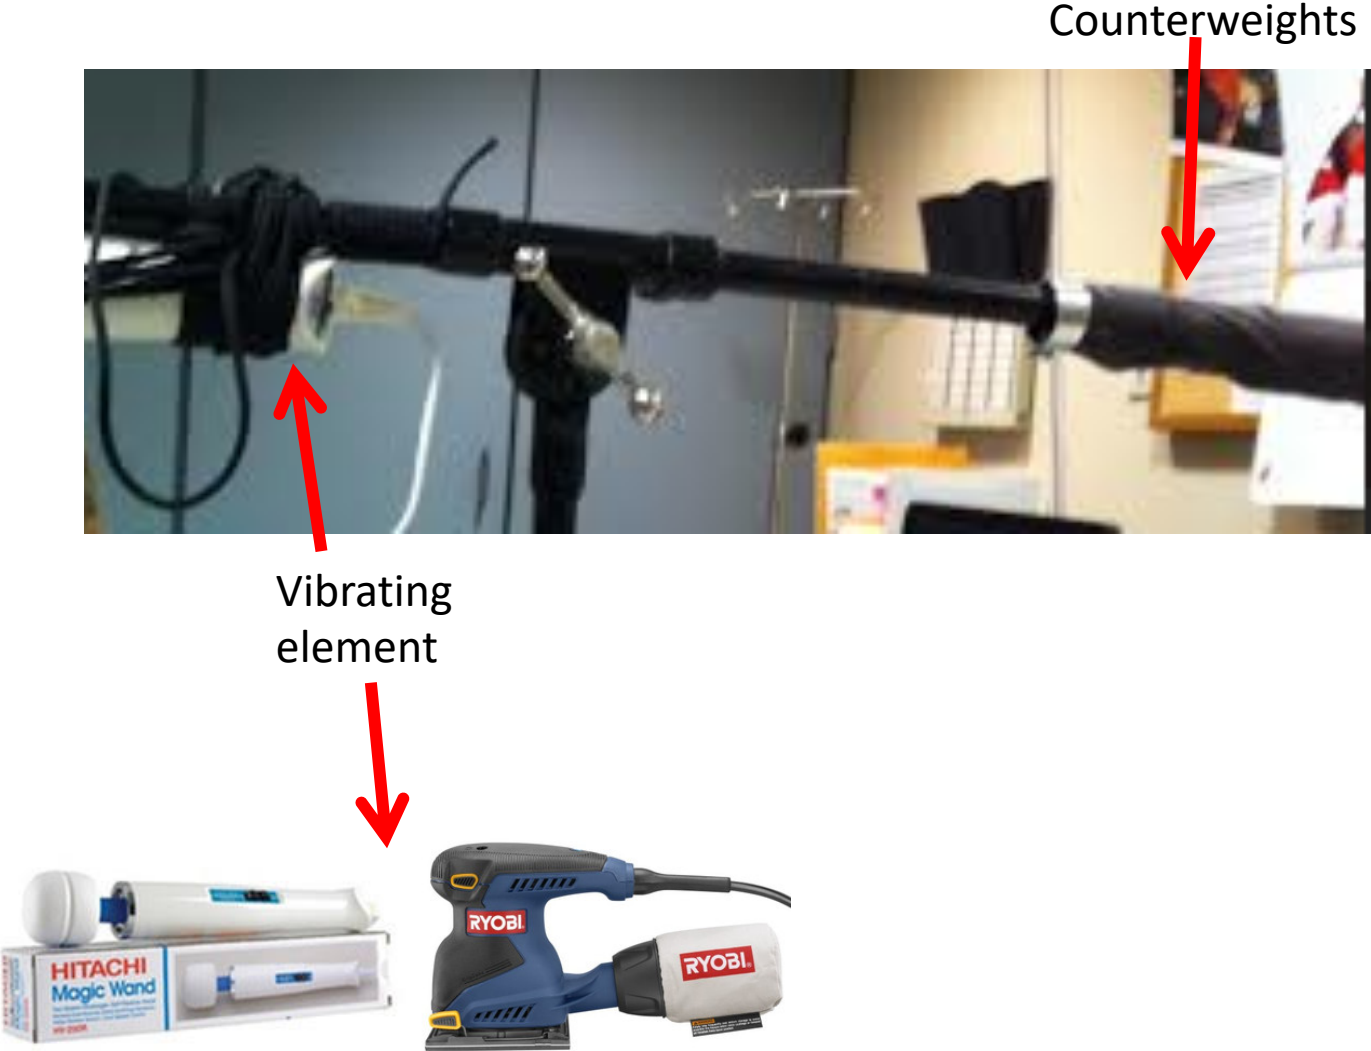

Supplement: s1 [file s1]
